# Supplementary material for: An electrochemical biosensor for rapid detection of E. coli O157:H7 with highly efficient bi-functional glucose oxidase-polydopamine nanocomposites and Prussian blue modified screen-printed interdigitated electrodes
Source: Royal Society of Chemistry journal article supplement (doi:10.1039/c6an00873a), 2016-01-01
Supplement: c6an00873a1.pdf [file c6an00873a1.pdf]

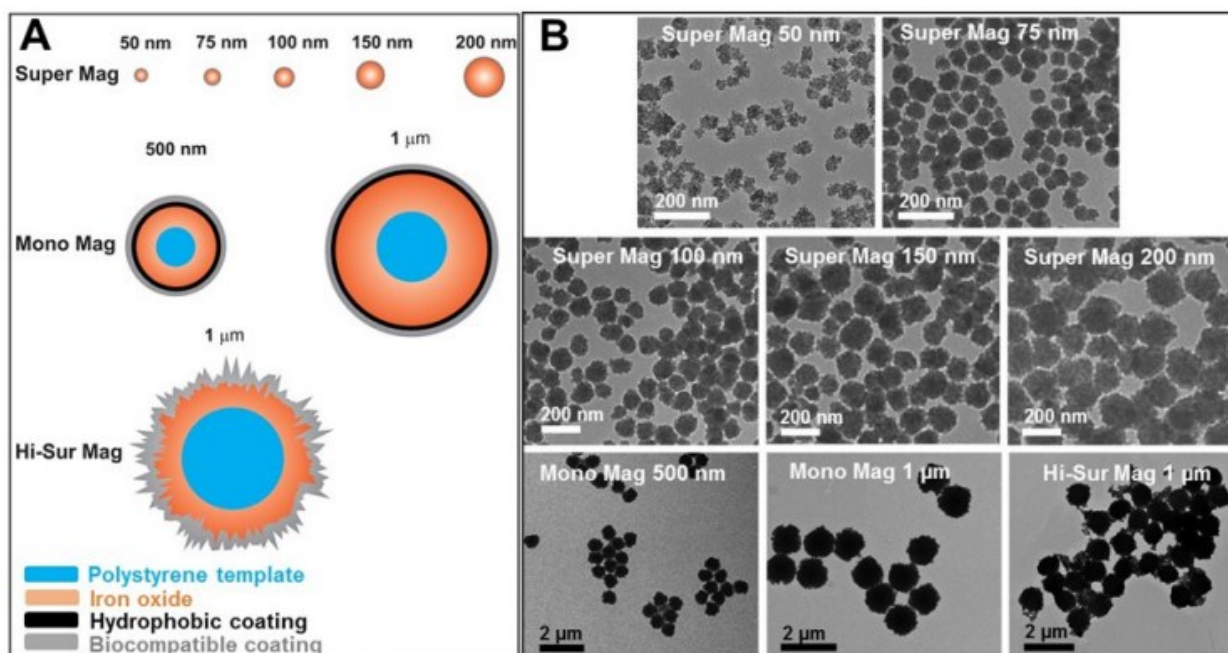

Figure S1. (A) Overall structure of the magnetic beads from Ocean NanoTech, and (B) TEM images of the magnetic beads at different sizes.

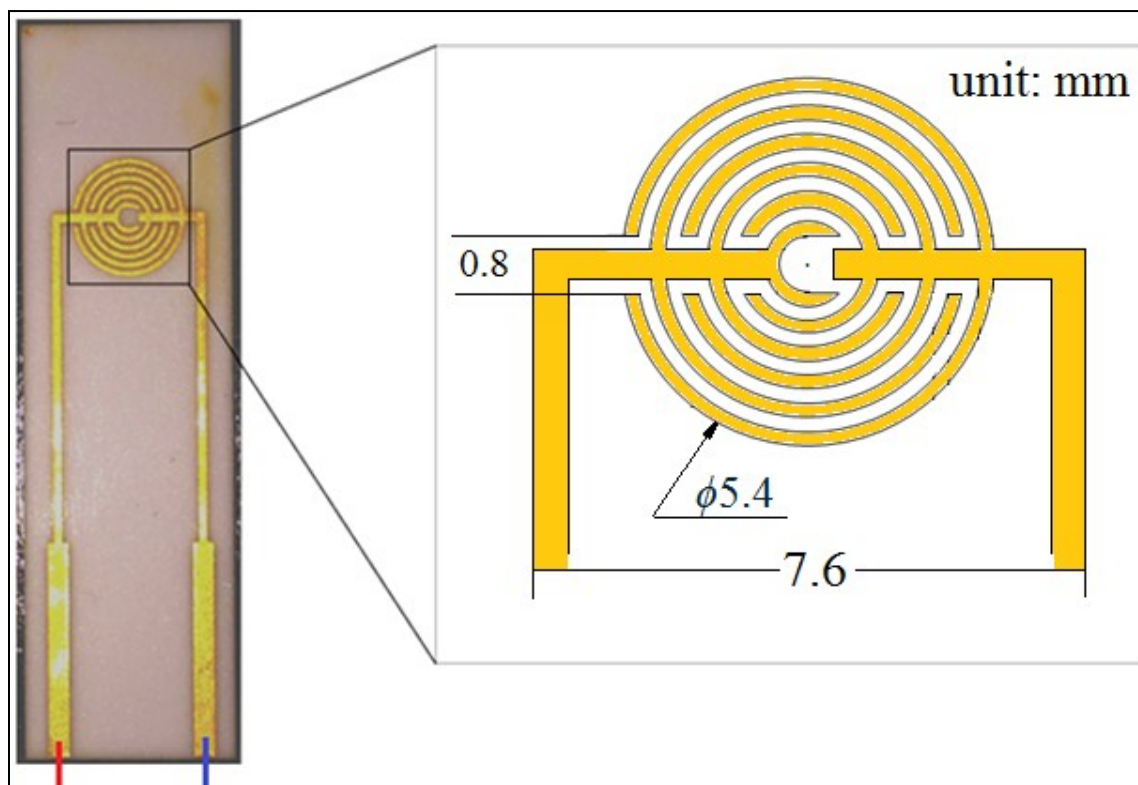

Figure S2. The configuration of the screen-printed interdigitated gold microelectrode.
